# Supplementary material for: The Genomic Scrapheap Challenge; Extracting Relevant Data from Unmapped Whole Genome Sequencing Reads, Including Strain Specific Genomic Segments, in Rats
Source: PubMed Central journal article supplement (PMC4976967; doi:10.1371/journal.pone.0160036), 2016-08-08
Supplement: pone.0160036.s001.pdf [file pone.0160036.s001.pdf]

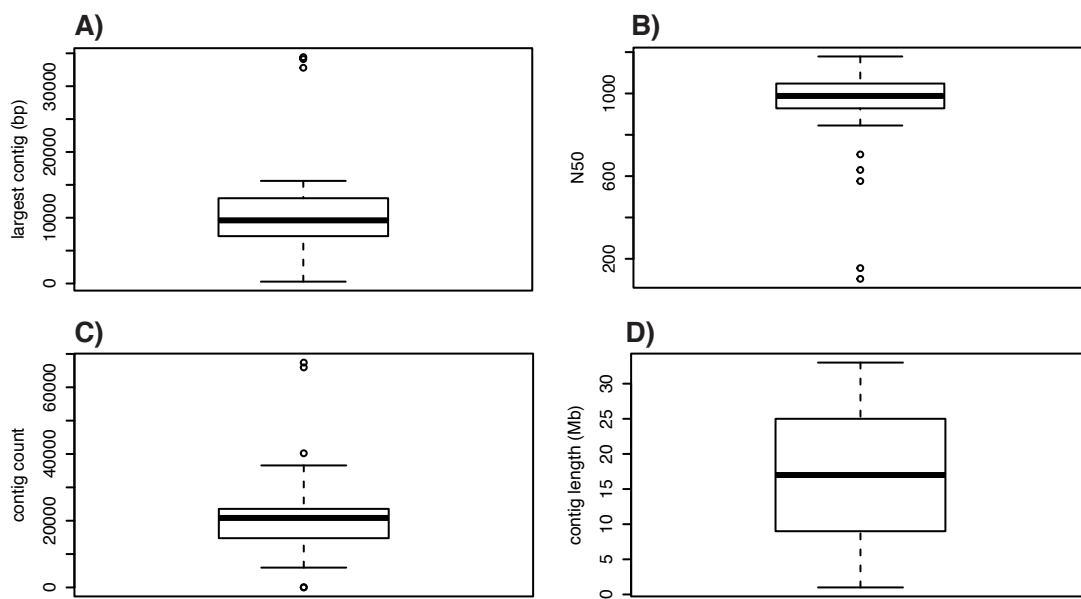

**Supplementary figure A - *De novo* assembly metrics.** Per-(sub)strain distribution of **A)** largest contig size, **B)** N50, **C)** amount of contigs and **D)** total contigs length.

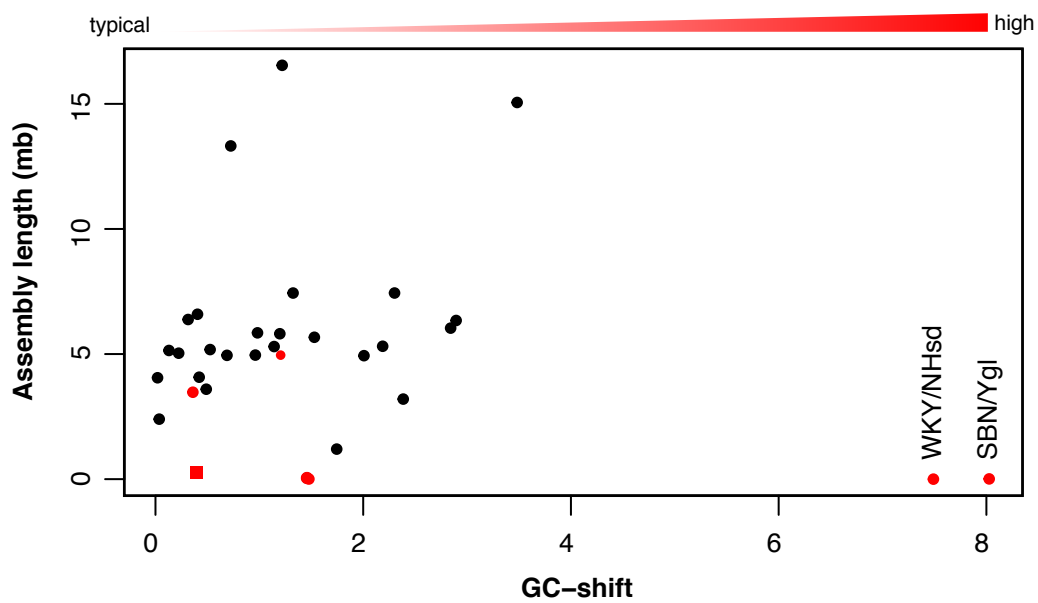

**Supplementary figure B - The effects of GC-shift and low coverage on the results of novo assembly.** Red dots denote the low (<20X) coverage strains: BBDP/Wor, LEW/NCrIBR, SR/Jr, SS/Jr WKY/NHsd and SBN/Ygl. The blue dot is sequenced on Illumina GAII (SHR/OlaIpcv).

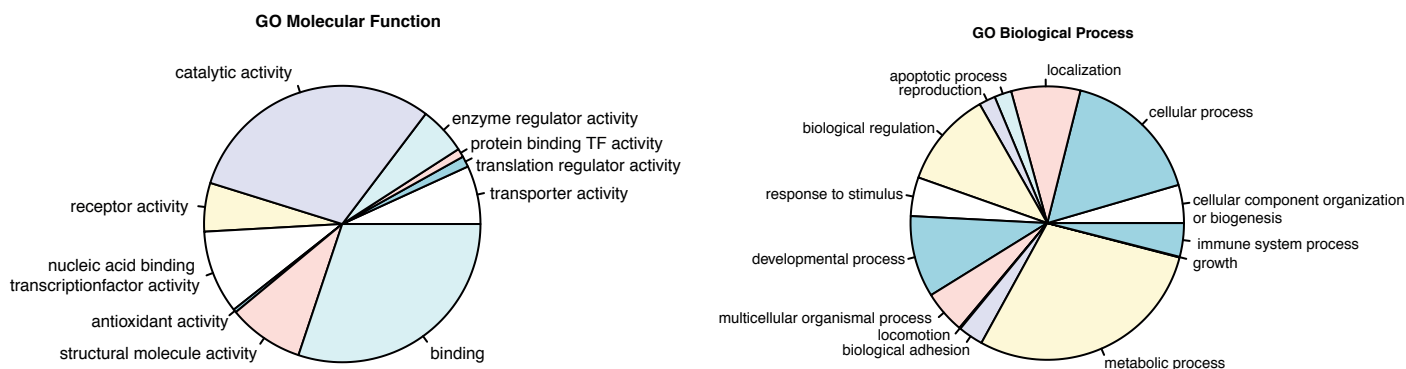

**Supplementary figure C - Functional classification of putative ORFs.**

Panther 9 output of the putative ORFs: the molecular functions “catalytic activity” and “binding” contribute to more than 50% of the found GO-terms. Metabolic processes are the largest biological process in the GO-terms.

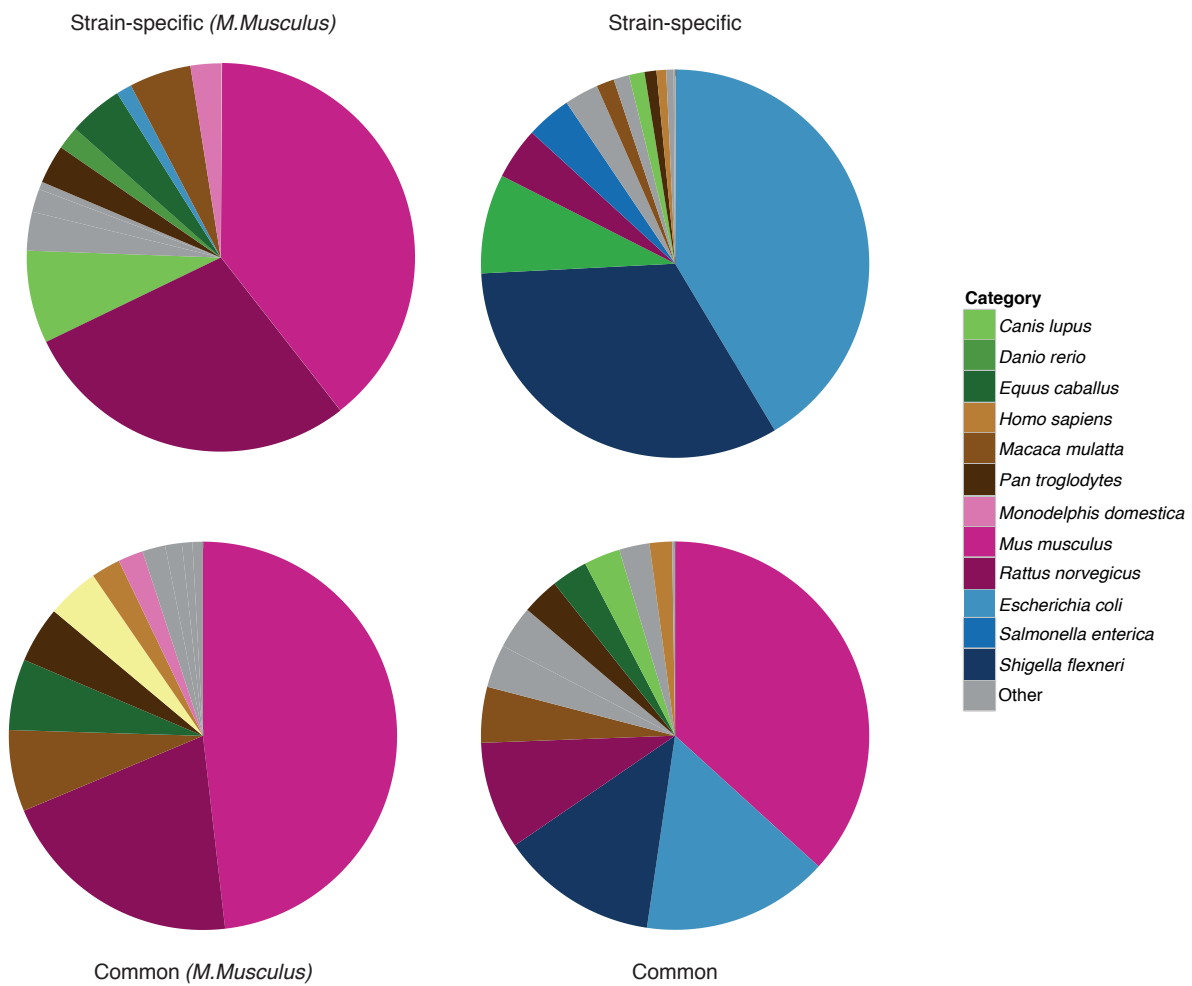

**Supplementary figure D - Organism-distribution of orthologs.** Based on the found orthologs of OrthoMCL, the majority of found orthologs is found in rodents.

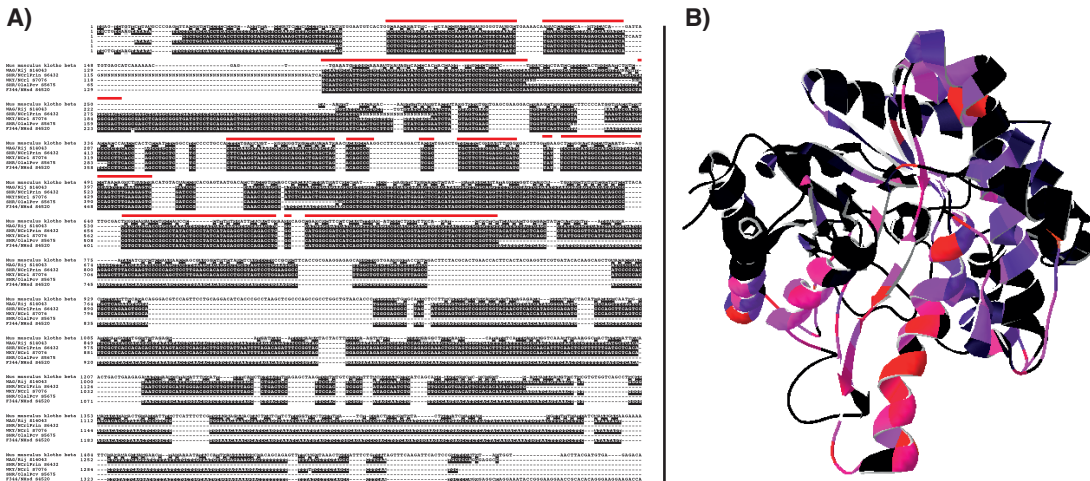

**Supplementary figure E - Klotho beta (KLB).** Large amounts of overlap are visible in both the DNA- and Protein-alignment **A)** Alignment of *Mus musculus* KLB-mRNA and the countigs of WAG/Rij, SHR/NCrIPrin, WKY/NCrI, SHR/OlaIPcv and F344/Nhsd. The red line denotes coverage (>10X) of SHR/OlaIPcv-liver RNA-seq data. **B)** Predicted proteins, superimposed on mouse KLB structure prediction: Magenta colouring shows areas with high amounts of overlap.
